# Supplementary material for: Modulation of defects and electrical behaviors of Cu-doped KNN ceramics by fluorine–oxygen substitution
Source: Royal Society of Chemistry journal article supplement (doi:10.1039/c9dt04133h), 2019-12-19
Supplement: c9dt04133h1.pdf [file c9dt04133h1.pdf]

## Supplemental Information for

### **Modulation of Defects and Electrical Behaviors in Cu-Doped KNN Ceramics by Fluorine-Oxygen Substitution**

You Liao,<sup>1,2,3</sup> Dongmei Wang,<sup>1,2,3</sup> Hua Wang,<sup>1</sup> Lingxi Zhou,<sup>1</sup> Qiaoji Zheng,<sup>\*,1</sup> and  
Dunmin Lin<sup>1</sup>

<sup>1</sup>*College of Chemistry and Materials Science, Sichuan Normal University, Chengdu,  
610066, People's Republic of China*

<sup>2</sup>*Institute of High Energy Physics, Chinese Academy of Sciences, Beijing, 100049,  
People's Republic of China*

<sup>3</sup>*School of Chemical Sciences, University of Chinese Academy of Sciences, Beijing  
100049, People's Republic of China*

**Table S1** The ionic radii of  $K^+$ ,  $Na^+$ ,  $Nb^{5+}$ ,  $Cu^{2+}$ ,  $O^{2-}$ , and  $F^-$  ions.

| Ion species | Coordination Number | Ionic Radius/Å |
|-------------|---------------------|----------------|
| $K^+$       | 12                  | 1.64           |
| $Na^+$      | 12                  | 1.39           |
| $Nb^{5+}$   | 6                   | 0.64           |
| $Cu^{2+}$   | 6                   | 0.73           |
| $O^{2-}$    | 6                   | 1.40           |
| $F^-$       | 6                   | 1.33           |

**Table S2.** The theoretical tolerance factor  $t$  of KNCNF- $x$  ceramics.

| Composition ( $x$ ) | Average ionic radius ( $\text{\AA}$ ) |                                |                                | Tolerance factor $t$ |
|---------------------|---------------------------------------|--------------------------------|--------------------------------|----------------------|
|                     | $R_{\text{A-site}}^{\text{a}}$        | $R_{\text{B-site}}^{\text{b}}$ | $R_{\text{O-site}}^{\text{c}}$ |                      |
| 0                   | 1.515                                 | 0.6409                         | 1.4                            | 1.00996425           |
| 0.04                | 1.515                                 | 0.6409                         | 1.3972                         | 1.01038031           |
| 0.12                | 1.515                                 | 0.6409                         | 1.3916                         | 1.01121588           |
| 0.20                | 1.515                                 | 0.6409                         | 1.386                          | 1.01205607           |
| 0.28                | 1.515                                 | 0.6409                         | 1.3804                         | 1.01290091           |

<sup>a</sup> Indicates the average ionic radius of  $\text{K}^+$  and  $\text{Na}^+$ .

<sup>b</sup> Indicates the weighted average ionic radius of  $\text{Nb}^{5+}$  and  $\text{Cu}^{2+}$ .

<sup>c</sup> Indicates the weighted average ionic radius of  $\text{O}^{2-}$  and  $\text{F}^-$ .

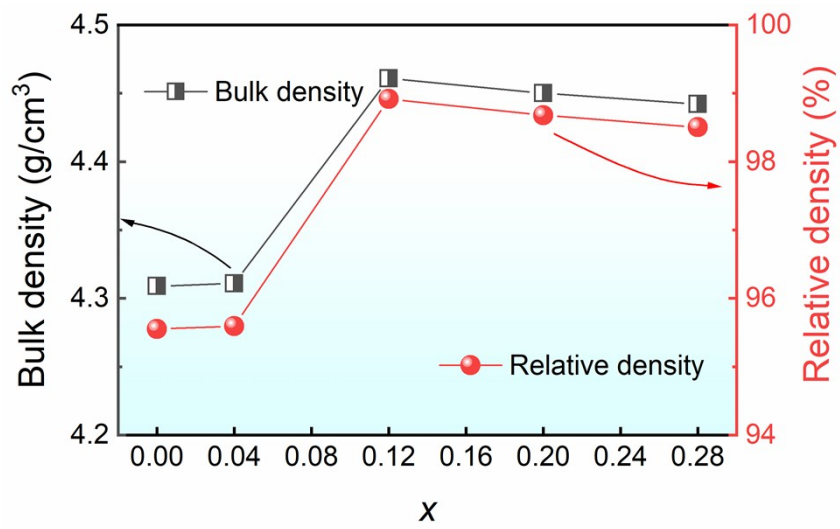

**Figure S1.** Component dependence of density for KNCNF-x ceramics.

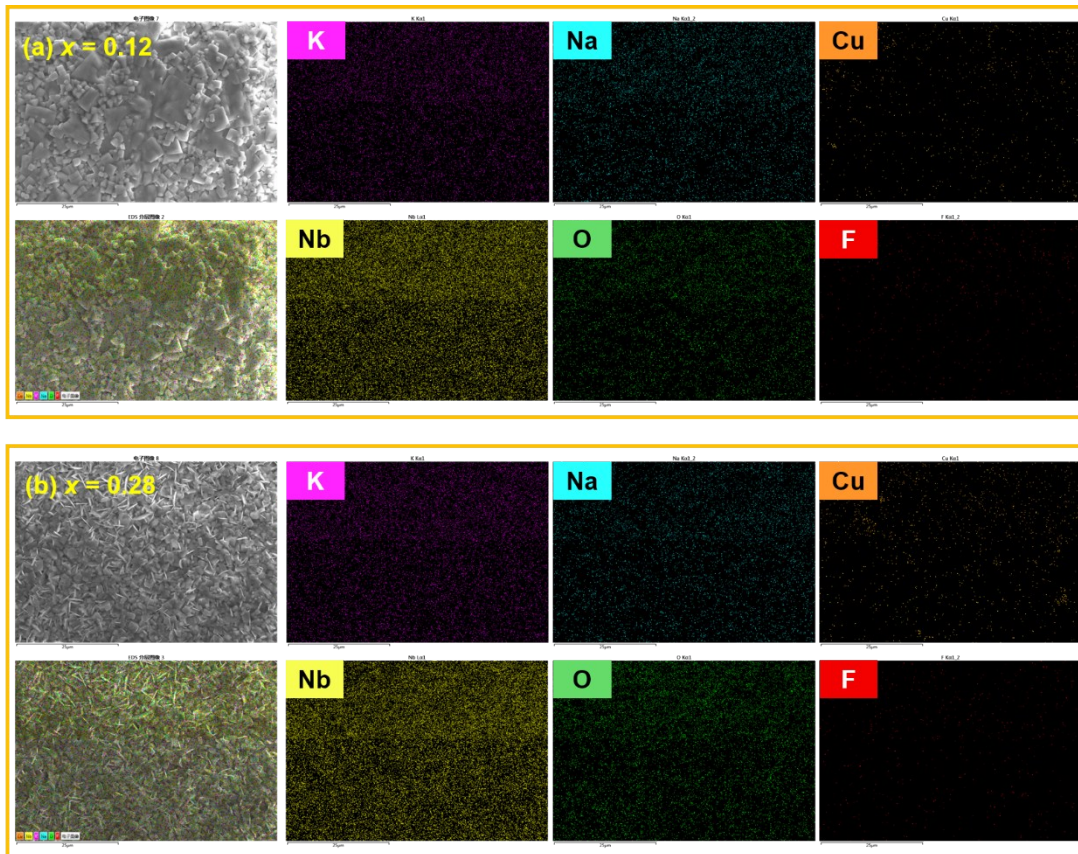

**Figure S2.** Element area profile of the surface for KNCNF- $x$  ceramics: (a)  $x = 0.12$  and (b)  $x = 0.28$ .

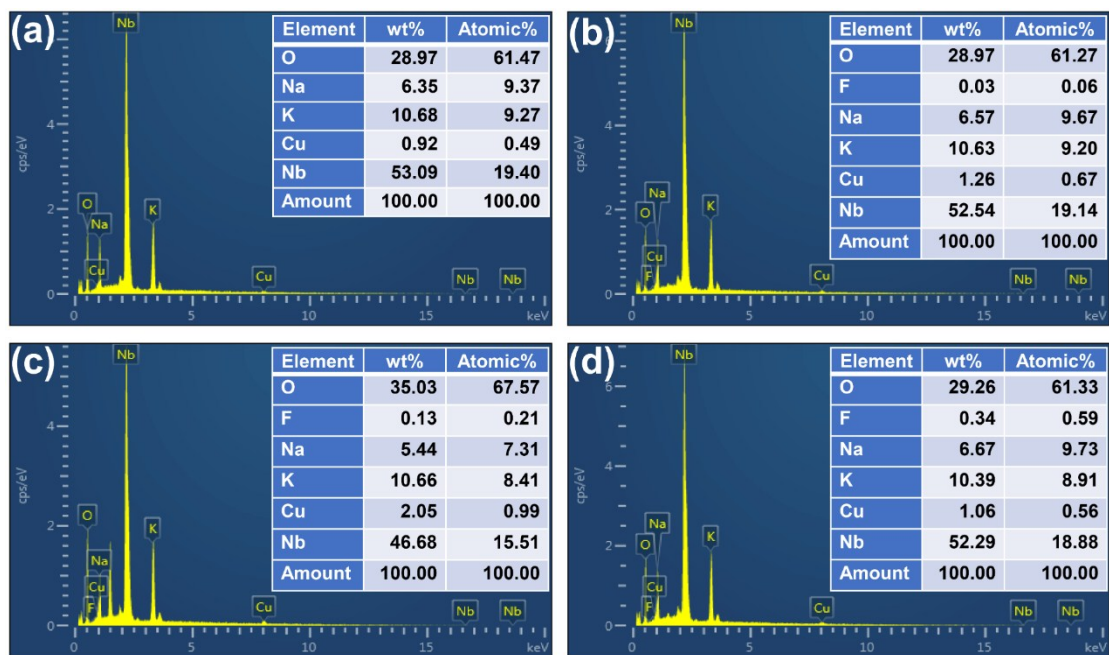

**Figure S3.** Energy dispersive spectroscopy (EDS) of surface morphology for KNCNF- $x$  ceramics: (a)  $x = 0$ , (b)  $x = 0.04$ , (c)  $x = 0.12$ , and (d)  $x = 0.28$ .

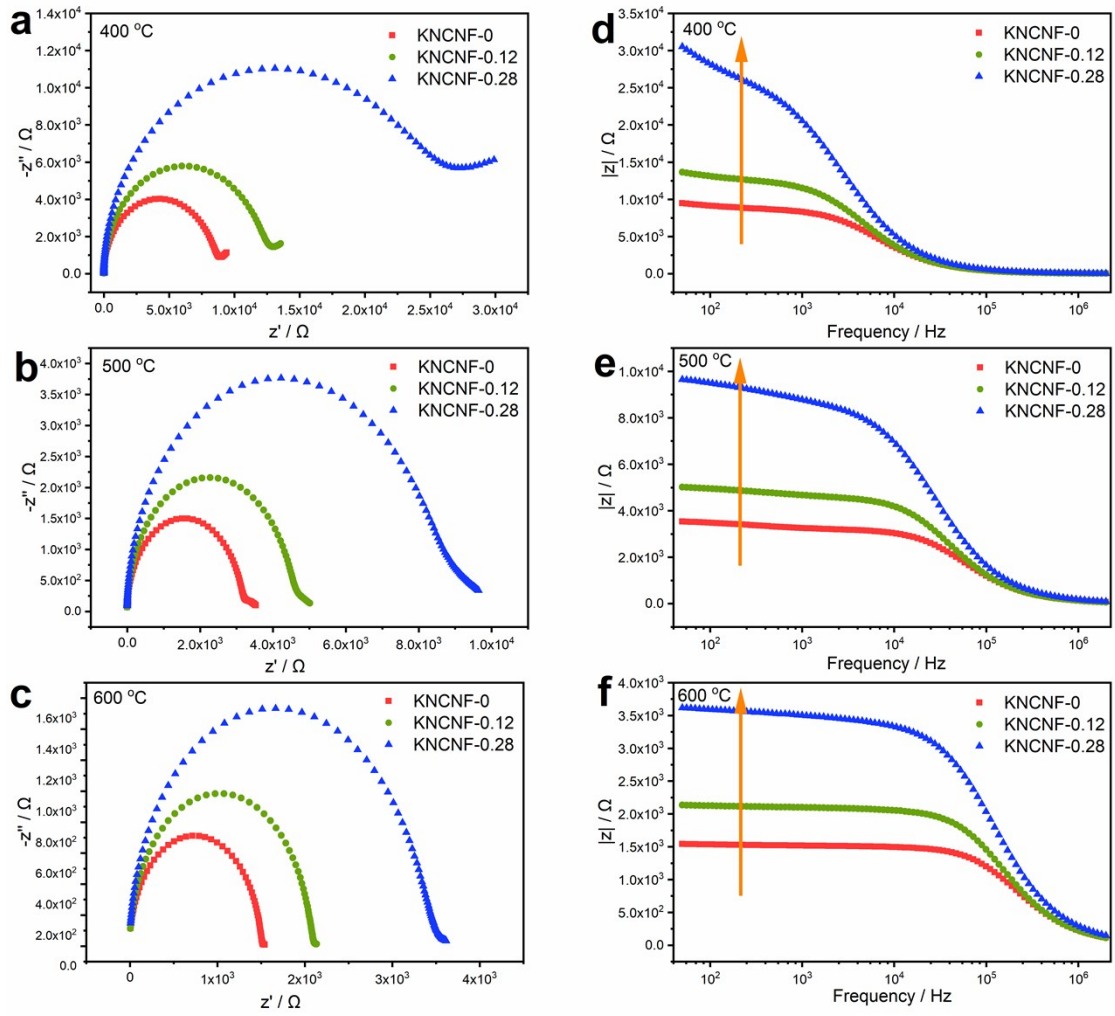

**Figure S4.** (a-c) Original data of the impedance spectroscopies and (d-f) the impedance-frequency ( $|Z|$ -f) curves for KNCNF- $x$  ceramics with  $x = 0, 0.12,$  and  $0.28$ .

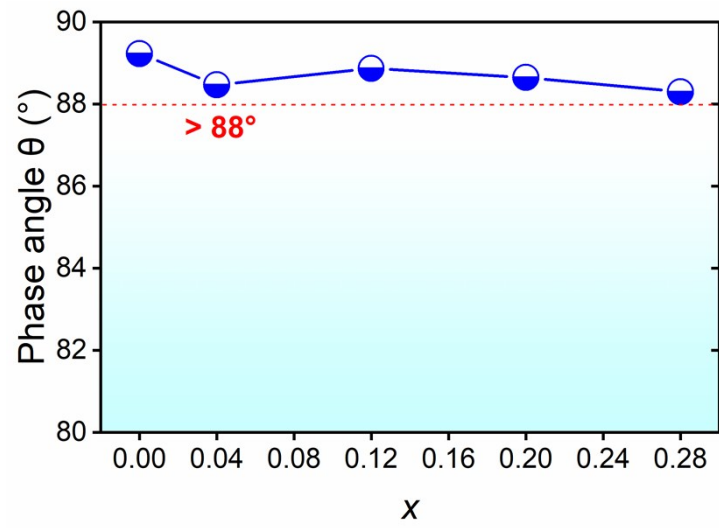

**Figure S5.** Component dependence of phase angle  $\theta$  for the KNCNF- $x$  ceramics.
